# Supplementary material for: Health Communication and Adherence to Noninvasive Ventilation in Chronic Hypercapnic Respiratory Failure: A Randomized Clinical Trial
Source: PubMed Central journal article supplement (PMC11672160; doi:10.1001/jamanetworkopen.2024.51614), 2024-12-26
Supplement: jamanetwopen-e2451614-s002.pdf [file jamanetwopen-e2451614-s002.pdf]

## Supplemental Online Content

Yu DF, Li PWC, Lau JCC, et al. Health communication and adherence to noninvasive ventilation in chronic hypercapnic respiratory failure: a randomized clinical trial. *JAMA Netw Open*. 2024;7(12):e2451614. doi:10.1001/jamanetworkopen.2024.51614

**eTable 1.** Statistics on Goal-Setting for the Intervention Group

**eTable 2.** Effects of the Information-Motivation-Behavioral–Noninvasive Ventilation (IMB-NIV) Program on Sleep Quality and Health-Related Quality of Life

**eTable 3.** Subgroup Analysis of the Effects of the Information-Motivation-Behavioral–Noninvasive Ventilation (IMB-NIV) Program on NIV Adherence

**eTable 4.** Subgroup Analysis of the Effects of the Information-Motivation-Behavioral–Noninvasive Ventilation (IMB-NIV) Program on Time to Hospital Service Use

**eTable 5.** Subgroup Analysis of the Effects of the Information-Motivation-Behavioral–Noninvasive Ventilation (IMB-NIV) Program on Number of Emergency Department Admissions and Hospital Admissions

This supplemental material has been provided by the authors to give readers additional information about their work.

**eTable 1. Statistics on Goal-Setting for the Intervention Group**

| <b>Category of the goals set for the intervention arm to increase the adherence to non-invasive ventilation</b>                                                                                  | <b>Number of patients being prescribed with the goal category<br/>N (%)</b> |
|--------------------------------------------------------------------------------------------------------------------------------------------------------------------------------------------------|-----------------------------------------------------------------------------|
| Category 1: Goals relating to improve symptom management of chronic hypercapnic respiratory failure.                                                                                             | 56 (90.3%)                                                                  |
| Category 2: Goals relating to reduce discomfort relating to the non-invasive ventilation.                                                                                                        | 57 (91.9%)                                                                  |
| Category 3: Goals relating to increase the self-care on the operation of the non-invasive ventilator.                                                                                            | 34 (54.8%)                                                                  |
| Category 4: Goals relating to reduce the unfavorable emotional response associated with the use of non-invasive ventilation.                                                                     | 29 (46.8%)                                                                  |
| Category 5: Goals relating to improving self-care on management chronic hypercapnic respiratory failure.                                                                                         | 44 (71.0%)                                                                  |
| Category 6: Goals relating to change the perception and misconception on the use of non-invasive ventilation.                                                                                    | 55 (88.7%)                                                                  |
| Category 7: Goals relating to increase the social capacity to enable the use of non-invasive ventilation (including reduce social unacceptance, effective help-seeking, and positive dependency) | 35 (56.5%)                                                                  |

**Table 2. Effects of the Information-Motivation-Behavioral–Noninvasive Ventilation (IMB-NIV) Program on Sleep Quality and Health-Related Quality of Life**

| Patient-reported outcome                   | Mean (SD)              |               | Treatment effect (95% CI)                          |                       | Time x group interaction effect by GEE |                  |
|--------------------------------------------|------------------------|---------------|----------------------------------------------------|-----------------------|----------------------------------------|------------------|
|                                            | IMB-based Intervention | Usual care    | Difference in change (IMB Intervention–usual care) | Effect size (Cohen d) | B (mea95% CI)                          | P value          |
| <b>PSQI – P1 sleep quality</b>             |                        |               |                                                    |                       |                                        |                  |
| Baseline                                   | 1.50 (0.76)            | 1.50 (0.80)   | N/A                                                | N/A                   | N/A                                    | N/A              |
| T1, posttest 7 <sup>th</sup> week;         | 1.51 (0.67)            | 1.68 (0.80)   | -0.17 (-0.50 - 0.16)                               | -.186                 | -0.17 (-0.50 - 0.15)                   | .300             |
| T2, posttest 3 <sup>rd</sup> month;        | 1.26 (0.60)            | 1.68 (0.72)   | -0.42 (-0.72 - -0.11)                              | -.493                 | -0.44 (-0.73 - -0.14)                  | <b>.004*</b>     |
| T3, posttest 6 <sup>th</sup> month         | 1.17 (0.69)            | 1.68 (0.66)   | -0.55 (-0.89 - -0.21)                              | -.594                 | -0.53 (-0.86 - -0.21)                  | <b>.001*</b>     |
| T4, posttest 12 <sup>th</sup> month        | 0.96 (0.57)            | 1.60 (0.76)   | -0.66 (-0.98 - -0.34)                              | -.780                 | -0.63 (-0.94 - -0.33)                  | <b>&lt;.001*</b> |
| <b>PSQI – P2 sleep latency</b>             |                        |               |                                                    |                       |                                        |                  |
| Baseline                                   | 1.56 (0.92)            | 1.68 (1.01)   | N/A                                                | N/A                   | N/A                                    | N/A              |
| T1, posttest 7 <sup>th</sup> week;         | 1.43 (0.85)            | 1.73 (0.96)   | -0.32 (-0.72 - 0.08)                               | -.647                 | -0.34 (-0.73 - 0.06)                   | .093             |
| T2, posttest 3 <sup>rd</sup> month;        | 1.42 (0.87)            | 1.89 (0.97)   | -0.50 (-0.90 - -0.10)                              | -.813                 | -0.53 (-0.92 - -0.13)                  | <b>.009*</b>     |
| T3, posttest 6 <sup>th</sup> month         | 1.05 (0.67)            | 1.64 (0.99)   | -0.71 (-1.13 - -0.29)                              | -.999                 | -0.72 (-1.13 - -0.32)                  | <b>&lt;.001*</b> |
| T4, posttest 12 <sup>th</sup> month        | 1.56 (1.02)            | 1.61 (1.06)   | -0.81 (-1.25 - -0.37)                              | -1.074                | -0.83 (-1.25 - -0.42)                  | <b>&lt;.001*</b> |
| <b>PSQI – P3 sleep duration</b>            |                        |               |                                                    |                       |                                        |                  |
| Baseline                                   | 1.56 (1.02)            | 1.61 (1.06)   | N/A                                                | N/A                   | N/A                                    | N/A              |
| T1, posttest 7 <sup>th</sup> week;         | 1.80 (0.89)            | 2.08 (0.75)   | -0.16 (-0.58 - 0.26)                               | -.139                 | -0.22 (-0.63 - 0.20)                   | .311             |
| T2, posttest 3 <sup>rd</sup> month;        | 1.39 (1.02)            | 1.88 (0.87)   | -0.37 (-0.78 - 0.05)                               | -.320                 | -0.45 (-0.86 - -0.04)                  | <b>.031*</b>     |
| T3, posttest 6 <sup>th</sup> month         | 1.30 (0.94)            | 1.93 (0.93)   | -0.50 (-0.96 - -0.04)                              | -.403                 | -0.60 (-1.04 - -0.15)                  | <b>.009*</b>     |
| T4, posttest 12 <sup>th</sup> month        | 1.21 (0.89)            | 2.02 (0.76)   | -0.68 (-1.13 - -0.24)                              | -.578                 | -0.78 (-1.21 - -0.35)                  | <b>&lt;.001*</b> |
| <b>PSQI – P4 habitual sleep efficiency</b> |                        |               |                                                    |                       |                                        |                  |
| Baseline                                   | 1.03 (1.24)            | 0.92 (1.22)   | N/A                                                | N/A                   | N/A                                    | N/A              |
| T1, posttest 7 <sup>th</sup> week;         | 1.48 (1.18)            | 1.46 (1.19)   | -0.12 (-0.67 - 0.44)                               | -.075                 | -0.11 (-0.66 - 0.44)                   | .697             |
| T2, posttest 3 <sup>rd</sup> month;        | 1.07 (1.06)            | 1.47 (1.19)   | -0.54 (-1.08 - -0.01)                              | -.369                 | -0.58 (-1.09 - 0.07)                   | <b>.025*</b>     |
| T3, posttest 6 <sup>th</sup> month         | 1.03 (1.12)            | 1.52 (1.31)   | -0.66 (-1.24 - -0.75)                              | -.415                 | -0.62 (-1.19 - -0.04)                  | <b>.035*</b>     |
| T4, posttest 12 <sup>th</sup> month        | 1.02 (1.21)            | 1.53 (1.20)   | -0.73 (-1.28 - -0.18)                              | -.498                 | -0.62 (-1.16 - -0.09)                  | <b>.023*</b>     |
| <b>PSQI – P5 sleep disturbance</b>         |                        |               |                                                    |                       |                                        |                  |
| Baseline                                   | 1.23 (0.49)            | 1.23 (0.53)   | N/A                                                | N/A                   | N/A                                    | N/A              |
| T1, posttest 7 <sup>th</sup> week;         | 1.10 (0.40)            | 1.12 (0.49)   | -0.01 (-0.22 - 0.20)                               | -.022                 | -0.03 (-0.24 - 0.17)                   | .752             |
| T2, posttest 3 <sup>rd</sup> month;        | 0.98 (0.34)            | 1.25 (0.54)   | -0.26 (-0.49 - -0.04)                              | -.420                 | -0.27 (-0.49 - -0.05)                  | <b>.017*</b>     |
| T3, posttest 6 <sup>th</sup> month         | 0.97 (0.32)            | 1.13 (0.43)   | -0.14 (-0.37 - 0.09)                               | -.228                 | -0.18 (-0.40 - 0.04)                   | .113             |
| T4, posttest 12 <sup>th</sup> month        | 1.04 (0.33)            | 1.25 (0.48)   | -0.23 (-0.47 - 0.01)                               | -.363                 | -0.24 (-0.46 - -0.01)                  | <b>.040*</b>     |
| <b>PSQI – P6 use of sleep medication</b>   |                        |               |                                                    |                       |                                        |                  |
| Baseline                                   | 0.37 (0.94)            | 0.37 (0.91)   | N/A                                                | N/A                   | N/A                                    | N/A              |
| T1, posttest 7 <sup>th</sup> week;         | 0.49 (1.04)            | 0.36 (0.91)   | 0.15 (-0.16 - 0.46)                                | .172                  | 0.14 (-0.17 - 0.45)                    | .362             |
| T2, posttest 3 <sup>rd</sup> month;        | 0.51 (1.04)            | 0.36 (0.91)   | 0.16 (-0.18 - 0.51)                                | .175                  | 0.16 (-0.18 - 0.49)                    | .354             |
| T3, posttest 6 <sup>th</sup> month         | 0.33 (0.86)            | 0.61 (1.04)   | -0.30 (-0.65 - 0.05)                               | -.312                 | -0.30 (-0.64 - 0.05)                   | .094             |
| T4, posttest 12 <sup>th</sup> month        | 0.52 (0.95)            | 0.65 (0.99)   | -0.45 (-0.55 - 0.25)                               | -.140                 | -0.16 (-0.55 - 0.22)                   | .403             |
| <b>PSQI – P7 day-time dysfunction</b>      |                        |               |                                                    |                       |                                        |                  |
| Baseline                                   | 1.05 (0.98)            | 0.92 (1.00)   | N/A                                                | N/A                   | N/A                                    | N/A              |
| T1, posttest 7 <sup>th</sup> week;         | 0.90 (0.75)            | 1.05 (0.88)   | -0.32 to (-0.69 - 0.05)                            | -.309                 | -0.30 (-0.66 - 0.07)                   | .111             |
| T2, posttest 3 <sup>rd</sup> month;        | 0.87 (0.69)            | 1.20 (0.87)   | -0.50 (-0.94 - -0.07)                              | -.418                 | -0.49 (-0.92 - -0.07)                  | <b>.023*</b>     |
| T3, posttest 6 <sup>th</sup> month         | 0.82 (0.68)            | 1.46 (0.89)   | -0.80 (-1.22 - -0.39)                              | -.715                 | -0.80 (-1.20 - -0.40)                  | <b>&lt;.001*</b> |
| T4, posttest 12 <sup>th</sup> month        | 0.71 (0.71)            | 1.45 (0.86)   | -0.89 (-1.35 - -0.42)                              | -.718                 | -0.89 (-1.34 - -0.45)                  | <b>&lt;.001*</b> |
| <b>CSRI – respiratory complaints</b>       |                        |               |                                                    |                       |                                        |                  |
| Baseline                                   | 58.82 (21.24)          | 64.06 (23.74) | N/A                                                | N/A                   | N/A                                    | N/A              |
| T1, posttest 7 <sup>th</sup> week;         | 59.22 (16.47)          | 55.51 (17.54) | 8.51 (0.55 - 16.46)                                | .387                  | 8.68 (0.88 - 16.48)                    | <b>.029*</b>     |
| T2, posttest 3 <sup>rd</sup> month;        | 63.22 (13.98)          | 54.29 (19.92) | 13.72 (5.90 - 21.54)                               | .635                  | 14.40 (6.78 - 22.03)                   | <b>&lt;.001*</b> |
| T3, posttest 6 <sup>th</sup> month         | 68.18 (15.26)          | 56.98 (16.36) | 16.64 (7.23 - 26.05)                               | .651                  | 17.16 (8.11 - 26.21)                   | <b>&lt;.001*</b> |
| T4, posttest 12 <sup>th</sup> month        | 69.53 (14.09)          | 56.76 (14.42) | 18.05 (0.42 - 26.69)                               | .787                  | 18.09 (9.94 - 26.25)                   | <b>&lt;.001*</b> |
| <b>CSRI – physical functioning</b>         |                        |               |                                                    |                       |                                        |                  |
| Baseline                                   | 54.37 (14.42)          | 60.48 (27.17) | N/A                                                | N/A                   | N/A                                    | N/A              |
| T1, posttest 7 <sup>th</sup> week;         | 65.30 (20.69)          | 61.86 (23.96) | 9.64 (2.22 - 17.06)                                | .470                  | 9.58 (2.27 - 16.90)                    | <b>.010*</b>     |
| T2, posttest 3 <sup>rd</sup> month;        | 69.74 (19.18)          | 62.29 (24.66) | 13.66 (5.37 - 21.95)                               | .596                  | 13.43 (5.30 - 21.56)                   | <b>.001*</b>     |

|                                            |               |               |                       |      |                       |        |
|--------------------------------------------|---------------|---------------|-----------------------|------|-----------------------|--------|
| T3, posttest 6 <sup>th</sup> month         | 69.03 (19.46) | 62.50 (22.77) | 12.70 (4.45 - 20.95)  | .567 | 12.87 (4.95 - 20.78)  | .001*  |
| T4, posttest 12 <sup>th</sup> month        | 69.64 (18.86) | 66.21 (22.66) | 9.73 (1.22 - 18.24)   | .430 | 9.49 (1.44 - 17.53)   | .021*  |
| <b>CSRI – attendant symptoms and sleep</b> |               |               |                       |      |                       |        |
| Baseline                                   | 58.12 (17.90) | 58.41 (21.31) | N/A                   | N/A  | N/A                   | N/A    |
| T1, posttest 7 <sup>th</sup> week;         | 59.07 (18.88) | 50.85 (19.02) | 8.14 (0.01 - 16.27)   | .362 | 8.18 (0.19 - 16.18)   | .045*  |
| T2, posttest 3 <sup>rd</sup> month;        | 63.41 (15.60) | 51.09 (18.89) | 12.23 (3.92 - 20.55)  | .532 | 12.36 (4.23 - 20.48)  | .003*  |
| T3, posttest 6 <sup>th</sup> month         | 64.23 (16.69) | 52.68 (17.11) | 11.51 (2.64 - 20.39)  | .478 | 12.59 (4.13 - 21.05)  | .004*  |
| T4, posttest 12 <sup>th</sup> month        | 71.56 (13.48) | 53.57 (18.85) | 17.31 (8.32 - 26.31)  | .724 | 18.71 (10.22 - 27.20) | <.001* |
| <b>CSRI – social relationship</b>          |               |               |                       |      |                       |        |
| Baseline                                   | 73.25 (15.93) | 73.59 (17.48) | N/A                   | N/A  | N/A                   | N/A    |
| T1, posttest 7 <sup>th</sup> week;         | 73.16 (16.61) | 72.39 (16.36) | 0.49 (-6.13 - 7.12)   | .027 | 0.65 (-5.84 - 7.13)   | .846   |
| T2, posttest 3 <sup>rd</sup> month;        | 76.57 (14.99) | 70.48 (19.41) | 5.82 (-1.11 - 12.74)  | .304 | 6.44 (-0.37 - 13.25)  | .064   |
| T3, posttest 6 <sup>th</sup> month         | 77.78 (13.19) | 70.68 (16.97) | 6.66 (0.73 - 12.58)   | .414 | 7.40 (1.69 - 13.10)   | .011*  |
| T4, posttest 12 <sup>th</sup> month        | 81.25 (11.54) | 74.09 (17.06) | 6.91 (0.50 - 13.31)   | .406 | 7.62 (1.44 - 13.81)   | .016*  |
| <b>CSRI – anxiety</b>                      |               |               |                       |      |                       |        |
| Baseline                                   | 69.27 (20.80) | 76.37 (23.51) | N/A                   | N/A  | N/A                   | N/A    |
| T1, posttest 7 <sup>th</sup> week;         | 62.21 (23.28) | 58.05 (27.32) | 10.66 (1.50 - 19.82)  | .421 | 11.14 (2.10 - 20.18)  | .016*  |
| T2, posttest 3 <sup>rd</sup> month;        | 68.85 (20.03) | 55.59 (26.26) | 19.76 (11.33 - 28.19) | .848 | 20.26 (11.94 - 28.57) | <.001* |
| T3, posttest 6 <sup>th</sup> month         | 71.08 (23.83) | 60.89 (26.22) | 17.99 (6.98 - 29.01)  | .601 | 18.10 (7.36 - 28.85)  | <.001* |
| T4, posttest 12 <sup>th</sup> month        | 81.61 (15.99) | 64.72 (21.95) | 24.51 (14.77 - 34.26) | .947 | 23.94 (14.38 - 33.49) | <.001* |
| <b>CSRI – psychological wellbeing</b>      |               |               |                       |      |                       |        |
| Baseline                                   | 66.44 (19.80) | 68.95 (21.10) | N/A                   | N/A  | N/A                   | N/A    |
| T1, posttest 7 <sup>th</sup> week;         | 73.73 (15.63) | 68.08 (17.92) | 7.38 (0.12 - 14.65)   | .367 | 7.55 (0.41 - 14.70)   | .038*  |
| T2, posttest 3 <sup>rd</sup> month;        | 77.78 (15.15) | 65.63 (19.42) | 13.89 (6.67 - 21.10)  | .696 | 14.53 (7.45 - 21.60)  | <.001* |
| T3, posttest 6 <sup>th</sup> month         | 76.20 (15.46) | 69.14 (16.58) | 9.28 (1.28 - 17.27)   | .427 | 9.93 (2.26 - 17.60)   | .011*  |
| T4, posttest 12 <sup>th</sup> month        | 80.36 (13.27) | 69.24 (17.18) | 12.70 (5.29 - 20.12)  | .644 | 13.65 (6.44 - 20.86)  | <.001* |
| <b>CSRI – social functioning</b>           |               |               |                       |      |                       |        |
| Baseline                                   | 60.53 (22.21) | 65.88 (22.24) | N/A                   | N/A  | N/A                   | N/A    |
| T1, posttest 7 <sup>th</sup> week;         | 62.70 (18.33) | 59.48 (23.62) | 8.44 (1.08 - 15.81)   | .415 | 8.33 (1.08 - 15.58)   | .024*  |
| T2, posttest 3 <sup>rd</sup> month;        | 67.62 (18.43) | 57.31 (23.68) | 15.53 (8.21 - 22.85)  | .767 | 15.54 (8.36 - 22.71)  | <.001* |
| T3, posttest 6 <sup>th</sup> month         | 66.09 (18.43) | 60.32 (20.08) | 11.70 (4.04 - 19.36)  | .562 | 11.80 (4.47 - 19.12)  | .002*  |
| T4, posttest 12 <sup>th</sup> month        | 72.21 (17.75) | 65.17 (19.49) | 13.09 (5.34 - 20.84)  | .636 | 12.77 (5.52 - 20.02)  | <.001* |

Pittsburg Sleep Quality Index (PSQI): range of score = 0-21, with higher score indicating poorer sleep quality; PSQI subscale score = 1-7, with higher score indicating poorer sleeping function; Chinese Severe Respiratory Insufficiency Questionnaire (CSRI): range of score = 0-100, with higher score indicating better health-related quality of life.

eTable 3. Subgroup Analysis of the Effects of the Information-Motivation-Behavioral-Noninvasive Ventilation (IMB-NIV) Program on NIV Adherence

| Patient-reported outcome                                                                                                                                                                                    | Mean (SD)              |               | Treatment effect (95% CI)                           |                       | Time x group interaction effect by GEE |                  |
|-------------------------------------------------------------------------------------------------------------------------------------------------------------------------------------------------------------|------------------------|---------------|-----------------------------------------------------|-----------------------|----------------------------------------|------------------|
|                                                                                                                                                                                                             | IMB-based Intervention | Usual care    | Difference in change (IMB Intervention– usual care) | Effect size (Cohen d) | B (95% CI)                             | P value          |
| <b>Subjects with chronic obstructive pulmonary disease as the etiology of chronic hypercapnic respiratory failure (N: intervention vs control = 17 vs 14)</b>                                               |                        |               |                                                     |                       |                                        |                  |
| <b>NIV use &gt;4hour days (%)</b>                                                                                                                                                                           |                        |               |                                                     |                       |                                        |                  |
| Baseline                                                                                                                                                                                                    | 54.19 (33.50)          | 39.21 (32.41) | N/A                                                 | N/A                   | N/A                                    | N/A              |
| T1, posttest 7 <sup>th</sup> week;                                                                                                                                                                          | 78.01 (32.73)          | 29.61 (38.53) | 32.04 (1.15 to 62.93)                               | .892                  | 32.60 (5.39 to 59.81)                  | <b>.019*</b>     |
| T2, posttest 3 <sup>rd</sup> month;                                                                                                                                                                         | 74.95 (36.04)          | 24.66 (41.90) | 33.94 (2.01 to 65.88)                               | .896                  | 34.89 (6.70 to 63.09)                  | <b>.015*</b>     |
| T3, posttest 6 <sup>th</sup> month                                                                                                                                                                          | 66.80 (45.10)          | 31.83 (40.85) | 22.39 (-13.93 to 58.72)                             | .527                  | 20.67 (-10.22 to 51.55)                | .190             |
| T4, posttest 12 <sup>th</sup> month                                                                                                                                                                         | 72.52 (37.03)          | 35.87 (39.22) | 20.99 (-10.88 to 52.85)                             | .566                  | 23.54 (-3.93 to 51.02)                 | .093             |
| <b>NIV mean hour usage daily</b>                                                                                                                                                                            |                        |               |                                                     |                       |                                        |                  |
| Baseline                                                                                                                                                                                                    | 3.76 (1.74)            | 2.57 (1.86)   | N/A                                                 | N/A                   | N/A                                    | N/A              |
| T1, posttest 7 <sup>th</sup> week;                                                                                                                                                                          | 5.92 (2.32)            | 2.28 (2.42)   | 2.23 (0.78 to 3.68)                                 | 1.158                 | 2.28 (0.86 to 3.70)                    | <b>.002*</b>     |
| T2, posttest 3 <sup>rd</sup> month;                                                                                                                                                                         | 5.88 (3.09)            | 2.23 (2.55)   | 2.23 (0.32 to 4.15)                                 | .879                  | 2.32 (0.58 to 4.06)                    | <b>.009*</b>     |
| T3, posttest 6 <sup>th</sup> month                                                                                                                                                                          | 5.70 (3.79)            | 2.07 (2.47)   | 2.55 (0.08 to 5.02)                                 | .811                  | 2.35 (0.17 to 4.52)                    | <b>.034*</b>     |
| T4, posttest 12 <sup>th</sup> month                                                                                                                                                                         | 6.15 (3.41)            | 2.56 (2.90)   | 2.31 (-0.09 to 4.70)                                | .768                  | 2.56 (0.46 to 4.66)                    | <b>.017*</b>     |
| <b>NIV use&gt;4 hour days for &gt;70% of the days (no. of participants (%))<sup>^</sup></b>                                                                                                                 |                        |               |                                                     |                       |                                        |                  |
| Baseline                                                                                                                                                                                                    | 0 (0.0)                | 0 (0.0)       | N/A                                                 |                       |                                        | N/A              |
| T1, posttest 7 <sup>th</sup> week;                                                                                                                                                                          | 11 (64.71)             | 1 (7.14)      | 0.05 (0.01 to 0.44)                                 |                       |                                        | <b>.002*</b>     |
| T2, posttest 3 <sup>rd</sup> month;                                                                                                                                                                         | 11 (64.71)             | 3 (21.43)     | 0.16 (0.03 to 0.83)                                 |                       |                                        | <b>.024*</b>     |
| T3, posttest 6 <sup>th</sup> month                                                                                                                                                                          | 11 (64.71)             | 2 (14.29)     | 0.09 (0.01 to 0.58)                                 |                       |                                        | <b>.006*</b>     |
| T4, posttest 12 <sup>th</sup> month                                                                                                                                                                         | 9 (52.94)              | 3 (21.43)     | 0.22 (0.04 to 1.18)                                 |                       |                                        | .069             |
| <b>Subjects with obstructive sleep apnea comorbid with other chronic respiratory disorder as the etiological factors of chronic hypercapnic respiratory failure (N: intervention vs control = 21 vs 24)</b> |                        |               |                                                     |                       |                                        |                  |
| <b>NIV use &gt;4hour days (%)</b>                                                                                                                                                                           |                        |               |                                                     |                       |                                        |                  |
| Baseline                                                                                                                                                                                                    | 45.51 (32.31)          | 38.81 (32.03) | N/A                                                 | N/A                   | N/A                                    | N/A              |
| T1, posttest 7 <sup>th</sup> week;                                                                                                                                                                          | 68.43 (40.94)          | 41.50 (34.35) | 15.64 (0.09 to 31.20)                               | .628                  | 16.42 (1.90 to 30.94)                  | <b>.027*</b>     |
| T2, posttest 3 <sup>rd</sup> month;                                                                                                                                                                         | 64.07 (40.79)          | 49.50 (42.11) | 5.01 (-13.29 to 23.30)                              | .173                  | 6.69 (-10.15 to 23.53)                 | .436             |
| T3, posttest 6 <sup>th</sup> month                                                                                                                                                                          | 67.11 (45.55)          | 42.49 (37.25) | 17.44 (-0.92 to 35.79)                              | .602                  | 17.96 (0.47 to 35.45)                  | <b>.044*</b>     |
| T4, posttest 12 <sup>th</sup> month                                                                                                                                                                         | 60.12 (44.90)          | 45.01 (44.90) | 5.72 (-14.28 to 25.73)                              | .185                  | 5.39 (-13.16 to 23.94)                 | .569             |
| <b>NIV mean hour usage daily</b>                                                                                                                                                                            |                        |               |                                                     |                       |                                        |                  |
| Baseline                                                                                                                                                                                                    | 3.39 (1.66)            | 2.89 (1.86)   | N/A                                                 | N/A                   | N/A                                    | N/A              |
| T1, posttest 7 <sup>th</sup> week;                                                                                                                                                                          | 5.38 (2.75)            | 2.84 (2.16)   | 1.76 (0.63 to 2.89)                                 | .973                  | 1.80 (0.73 to 2.87)                    | <b>&lt;.001*</b> |
| T2, posttest 3 <sup>rd</sup> month;                                                                                                                                                                         | 5.05 (3.23)            | 3.23 (2.72)   | 1.17 (-0.32 to 2.66)                                | .498                  | 1.26 (-0.14 to 2.65)                   | .078             |
| T3, posttest 6 <sup>th</sup> month                                                                                                                                                                          | 5.52 (3.17)            | 2.96 (2.64)   | 2.02 (0.55 to 3.49)                                 | .869                  | 1.96 (0.52 to 3.40)                    | <b>.008*</b>     |
| T4, posttest 12 <sup>th</sup> month                                                                                                                                                                         | 4.61 (3.35)            | 2.93 (2.36)   | 0.91 (-0.52 to 2.34)                                | .414                  | 1.11 (-0.37 to 2.59)                   | .142             |
| <b>NIV use&gt;4 hour days for &gt;70% of the days (no. of participants (%))<sup>^</sup></b>                                                                                                                 |                        |               |                                                     |                       |                                        |                  |
| Baseline                                                                                                                                                                                                    | 0 (0.0)                | 0 (0.0)       | N/A                                                 |                       |                                        | N/A              |
| T1, posttest 7 <sup>th</sup> week;                                                                                                                                                                          | 12 (60.0)              | 2 (9.1)       | 0.067 (0.012 to 0.367)                              |                       |                                        | <b>&lt;.001*</b> |

|                                     |           |          |                        |  |  |              |
|-------------------------------------|-----------|----------|------------------------|--|--|--------------|
| T2, posttest 3 <sup>rd</sup> month; | 11 (55.0) | 6 (28.6) | 0.327 (0.090 to 1.193) |  |  | .086         |
| T3, posttest 6 <sup>th</sup> month  | 13 (68.4) | 5 (22.7) | 0.136 (0.034 to 0.545) |  |  | <b>.003*</b> |
| T4, posttest 12 <sup>th</sup> month | 9 (52.9)  | 4 (17.4) | 0.187 (0.044 to 0.789) |  |  | <b>.018*</b> |

**Subjects with obstructive sleep apnea comorbid as the etiology of chronic hypercapnic respiratory failure  
(N: intervention vs control = 9 vs 10)**

**NIV use >4hour days  
(%)**

|                                     |               |               |                      |       |                     |                  |
|-------------------------------------|---------------|---------------|----------------------|-------|---------------------|------------------|
| Baseline                            | 43.51 (34.08) | 46.62 (35.75) | N/A                  | N/A   | N/A                 | N/A              |
| T1, posttest 7 <sup>th</sup> week;  | 76.91 (30.86) | 29.32 (28.87) | 50.70 (24.97-76.44)  | 1.910 | 50.70 (27.84-73.57) | <b>&lt;.001*</b> |
| T2, posttest 3 <sup>rd</sup> month; | 79.26 (29.14) | 21.09 (31.13) | 61.28 (29.32-93.24)  | 1.859 | 61.28 (14.14-33.56) | <b>&lt;.001*</b> |
| T3, posttest 6 <sup>th</sup> month  | 73.01 (32.31) | 23.97 (34.47) | 57.33 (24.85-89.82)  | 1.764 | 54.21 (14.03-26.71) | <b>&lt;.001*</b> |
| T4, posttest 12 <sup>th</sup> month | 83.04(34.98)  | 26.79 (28.26) | 63.79 (26.89-100.69) | 1.854 | 63.81 (33.33-94.28) | <b>&lt;.001*</b> |

**NIV mean hour  
usage daily**

|                                     |             |             |                    |       |                   |                  |
|-------------------------------------|-------------|-------------|--------------------|-------|-------------------|------------------|
| Baseline                            | 3.06 (2.05) | 2.91 (1.95) | N/A                | N/A   | N/A               | N/A              |
| T1, posttest 7 <sup>th</sup> week;  | 5.85 (2.31) | 1.97 (1.82) | 3.72 (1.95- 5.50)  | 2.031 | 3.72 (2.13- 5.32) | <b>&lt;.001*</b> |
| T2, posttest 3 <sup>rd</sup> month; | 6.18 (2.02) | 1.63 (1.95) | 4.36 (2.56- 6.17)  | 2.340 | 4.40 (2.81-5.99)  | <b>&lt;.001*</b> |
| T3, posttest 6 <sup>th</sup> month  | 5.86 (2.75) | 1.91 (2.02) | 4.12 (1.72 - 6.52) | 1.716 | 3.96 (1.89-6.04)  | <b>&lt;.001*</b> |
| T4, posttest 12 <sup>th</sup> month | 6.51 (2.97) | 1.83 (1.61) | 4.80 (2.13- 7.46)  | 1.932 | 4.90 (2.75-7.05)  | <b>&lt;.001*</b> |

**NIV use>4 hour days for >70% of the days  
(no. of participants (%))<sup>^</sup>**

|                                     |           |          |                        |  |  |                  |
|-------------------------------------|-----------|----------|------------------------|--|--|------------------|
| Baseline                            | 0 (0.0)   | 0 (0.0)  | N/A                    |  |  | N/A              |
| T1, posttest 7 <sup>th</sup> week;  | 6 (66.67) | 1 (10.0) | 0.056 (0.005 to 0.669) |  |  | <b>.011*</b>     |
| T2, posttest 3 <sup>rd</sup> month; | 8 (88.89) | 1 (10.0) | 0.014 (0.001 to 0.260) |  |  | <b>&lt;.001*</b> |
| T3, posttest 6 <sup>th</sup> month  | 6 (66.67) | 1 (10.0) | 0.063 (0.005 to 0.760) |  |  | <b>.016*</b>     |
| T4, posttest 12 <sup>th</sup> month | 7 (77.78) | 0 (0.0)  | N/A                    |  |  | <b>&lt;.001*</b> |

eTable 4. Subgroup Analysis of the Effects of the Information-Motivation-Behavioral–Noninvasive Ventilation (IMB-NIV) Program on Time to Hospital Service Use

|                                                                                                                                     | Emergency room admission<br>Hazard ratio (95% confidence interval) <sup>a</sup> | Hospital admission<br>Hazard ratio (95% confidence interval) <sup>a</sup> |
|-------------------------------------------------------------------------------------------------------------------------------------|---------------------------------------------------------------------------------|---------------------------------------------------------------------------|
| CHRF subgroup with COPD as the relating etiology, N (IMB-NIV vs usual care) = 17vs14                                                | 0.393 (0.140 – 1.103)                                                           | 0.457 (0.165 – 1.265)                                                     |
| CHRF subgroup with OSA comorbid with other chronic respiratory disease as the relating etiology, N (IMB-NIV vs usual care) = 21vs24 | 0.534 (0.145 – 1.968)                                                           | 0.534 (0.145 – 0.168)                                                     |
| CHRF subgroup with OSA <sup>d</sup> as the relating etiology, N (IMB-NIV vs usual care) = 9vs10                                     | 2.0068 (0.089 – 48.099)                                                         | 820.158 (0 – 13705063023)                                                 |

CHRF = Chronic hypercapnic respiratory failure; COPD = chronic obstructive pulmonary disease; OSA = Obstructive sleep apnea; <sup>a</sup> The Cox proportional hazards regression model has adjusted for the age, Charlson Comorbidity Index, and smoking history.

eTable 5. Subgroup Analysis of the Effects of the Information-Motivation-Behavioral–Noninvasive Ventilation (IMB-NIV) Program on Number of Emergency Department Admissions and Hospital Admissions

|                                                                                                                                                  | Emergency room admission <sup>a</sup> |            |                                                | Hospital admission <sup>a</sup> |            |                                                |
|--------------------------------------------------------------------------------------------------------------------------------------------------|---------------------------------------|------------|------------------------------------------------|---------------------------------|------------|------------------------------------------------|
|                                                                                                                                                  | Total number of admissions            |            | Incident risk ratios (95% confidence interval) | Total number of admissions      |            | Incident risk ratios (95% confidence interval) |
|                                                                                                                                                  | IMB-NIV                               | usual care |                                                | IMB-NIV                         | usual care |                                                |
| CHRF subgroup with COPD <sup>b</sup> as the relating etiology, N (IMB-NIV vs usual care) = 17vs14                                                | 13                                    | 44         | 0.234 (0.088 – 0.623)                          | 20                              | 41         | 0.399 (0.160 – 0.994)                          |
| CHRF subgroup with OSA comorbid with other chronic respiratory disease <sup>c</sup> as the relating etiology, N (IMB-NIV vs usual care) = 21vs24 | 24                                    | 7          | 1.056 (0.276 – 4.042)                          | 16                              | 7          | 2.508 (0.770-8.172)                            |
| CHRF subgroup with OSA <sup>d</sup> as the relating etiology, N (IMB-NIV vs usual care) = 9vs10                                                  | 1                                     | 1          | 1.667 (0.069 – 38.643)                         | 1                               | 1          | 0.00                                           |

CHRF = Chronic hypercapnic respiratory failure; COPD = chronic obstructive pulmonary disease; OSA = Obstructive sleep apnea; <sup>a</sup> The binominal negative regression model has adjusted for the age, Charlson Comorbidity Index, and smoking history.
